# Supplementary material
Source: Royal Society of Chemistry journal article supplement (doi:10.1039/d6ce00207b)
Supplement: d6ce00207b6.pdf [file d6ce00207b6.pdf]

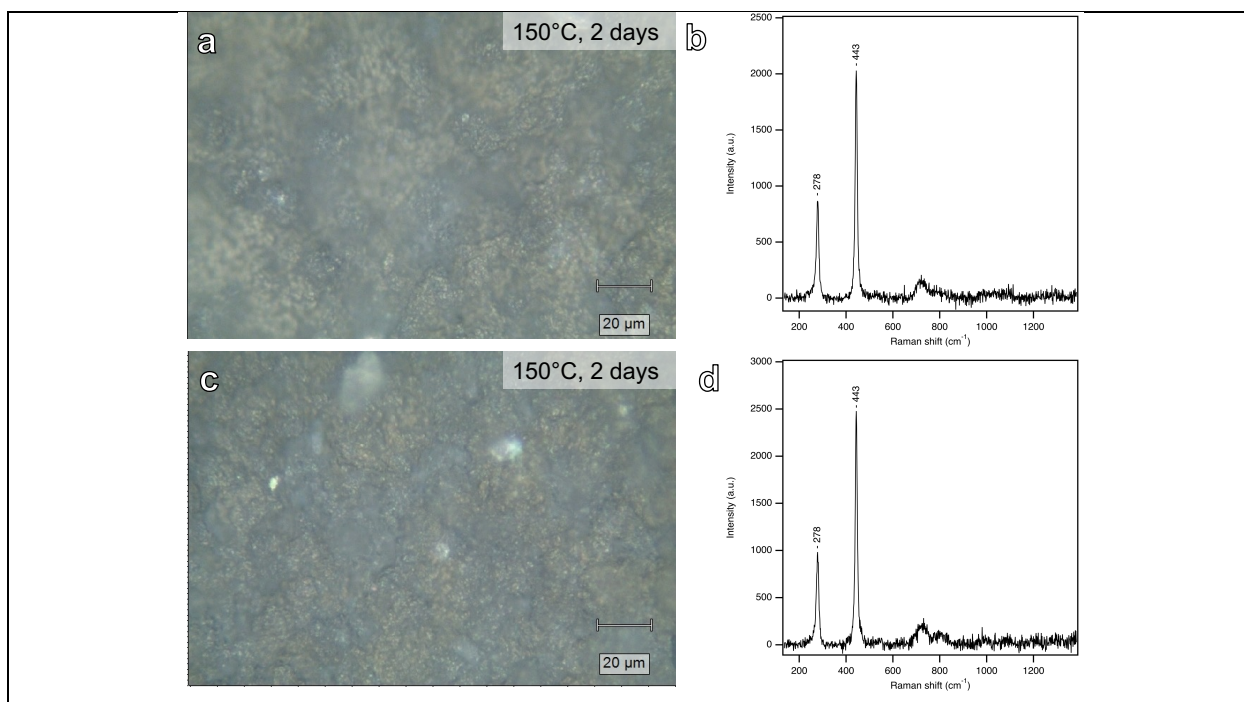

Fig. S4 Raman characterization of MgO reacted in vapor for 150°C for 2 days. Two different locations on the sample were measured. a) and c) show light microscopy images of the measurement position, which is in the center of the image. b and d show Raman spectra with peak positions typical for brucite at 278 and 443  $\text{cm}^{-1}$  matching literature data.<sup>8</sup>
