# Supplementary material
Source: Royal Society of Chemistry journal article supplement (doi:10.1039/d6ce00207b)

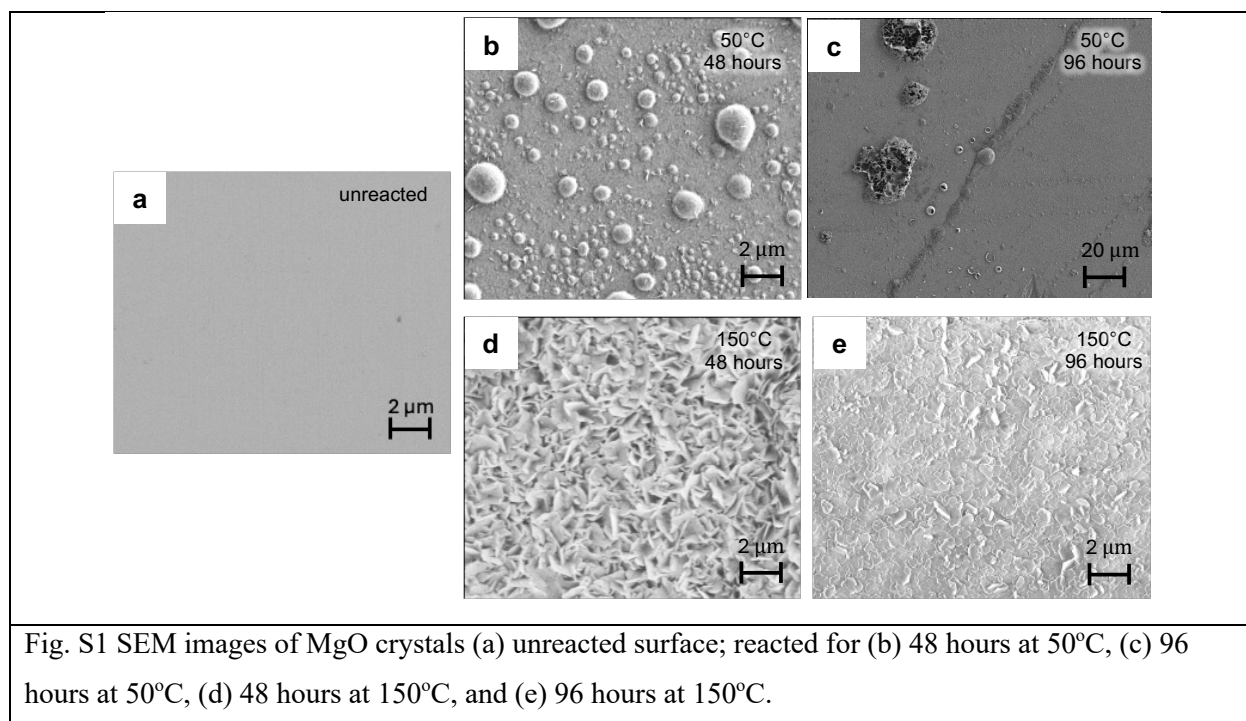

Supplement: d6ce00207b3.pdf [file d6ce00207b3.pdf]

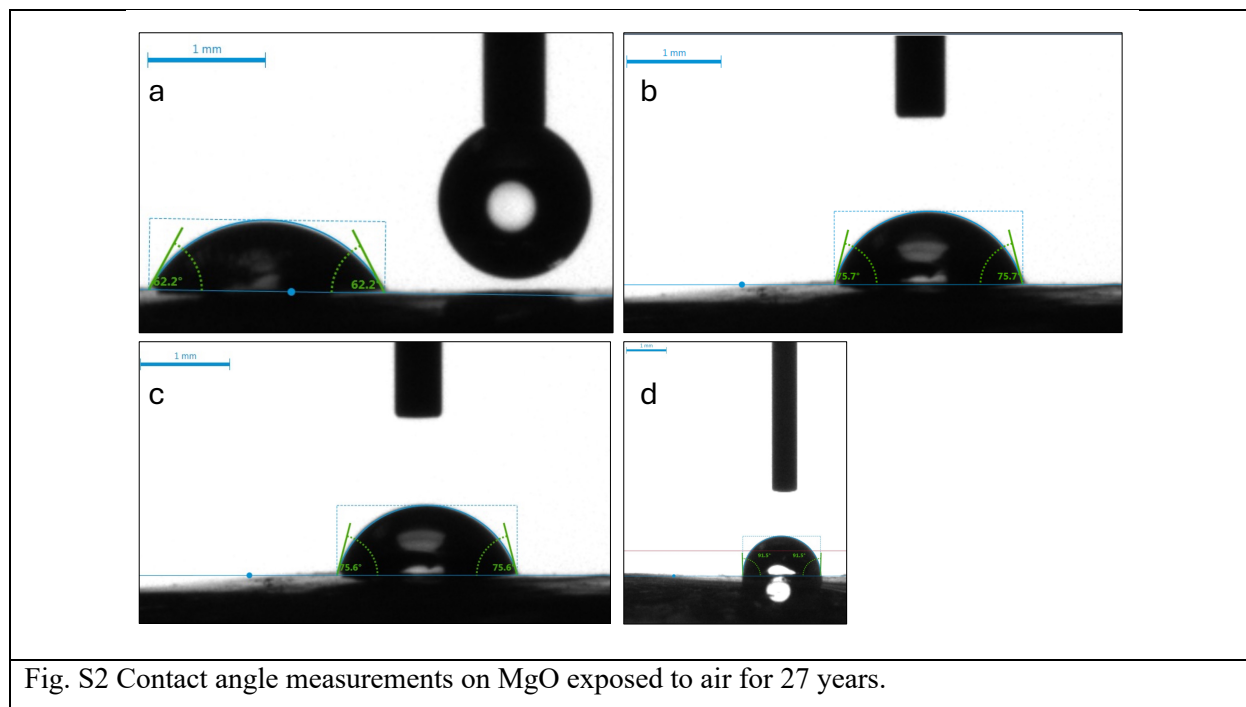

Fig. S2 Contact angle measurements on MgO exposed to air for 27 years.

Supplement: d6ce00207b4.pdf [file d6ce00207b4.pdf]

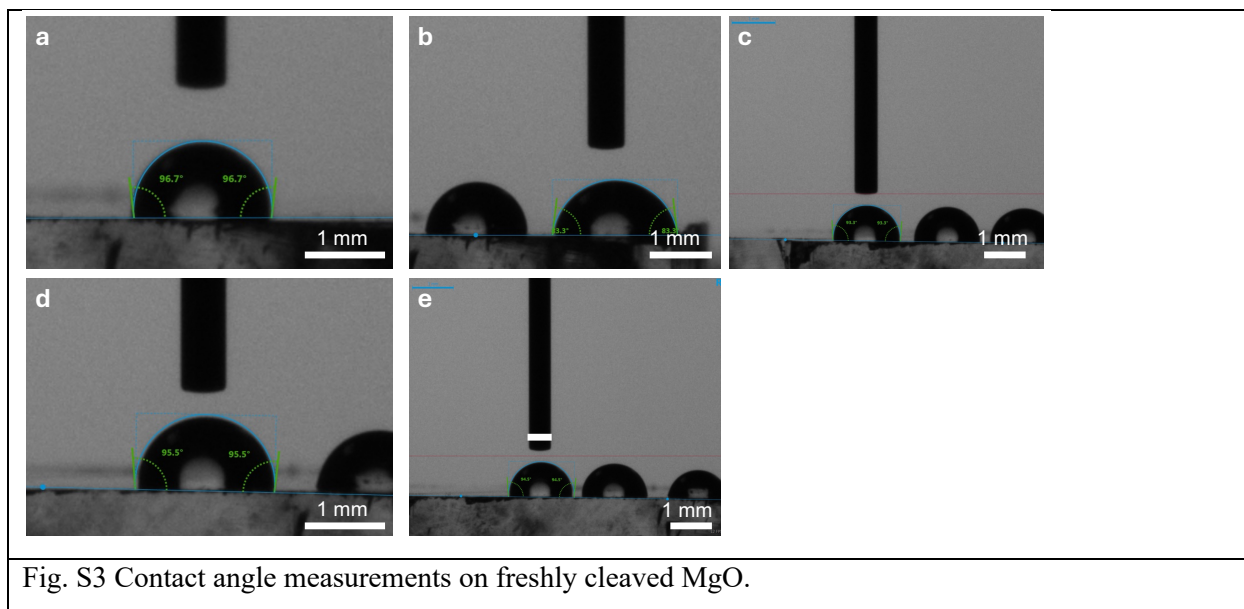

Fig. S3 Contact angle measurements on freshly cleaved MgO.

Supplement: d6ce00207b5.pdf [file d6ce00207b5.pdf]
